# Supplementary material
Source: Springer Nature journal article supplement (https://www.springermedizin.de/resource/supplementary/13098_2010_60_MOESM2_ESM.pdf/9670428)

## Pooled HDL-c

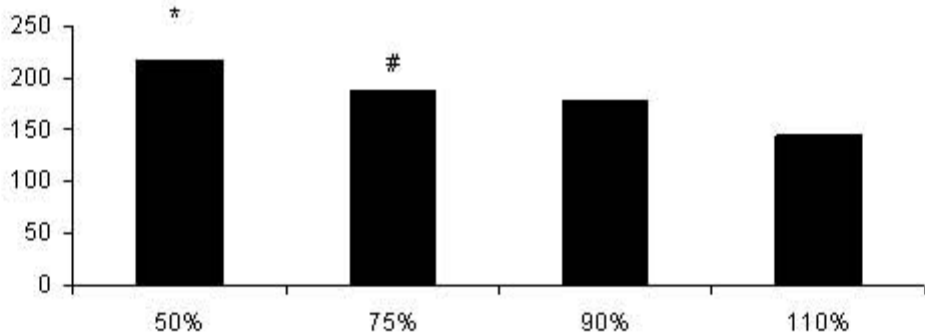

Supplement: MOESM2 [file 9670428]
